# Supplementary material for: Factors Associated with the Acceptance of New Technologies for Ageing in Place by People over 64 Years of Age
Source: MDPI journal article supplement (doi:10.3390/ijerph19052947), 2022-03-03
Supplement: s1 [file s1]

## Modificado de TAM (Modelo de Aceptación Tecnológica)

Teniendo en cuenta un dispositivo tecnológico para el envejecimiento en el hogar (por ejemplo un asistente de voz), responde a las siguientes preguntas de 1 (menos o nada de acuerdo) a 5 (totalmente de acuerdo)

|                                                                                   |       |
|-----------------------------------------------------------------------------------|-------|
| <b>Facilidad de uso percibida</b>                                                 |       |
| 01 Siento que podría usar bien este sistema                                       |       |
| <input type="radio"/>                                                             | 1     |
| <input type="radio"/>                                                             | 2     |
| <input type="radio"/>                                                             | 3     |
| <input type="radio"/>                                                             | 4     |
| <input type="radio"/>                                                             | 5     |
| <input type="radio"/>                                                             | NS/NC |
| 02 Creo que me sería fácil aprender a utilizarlo                                  |       |
| <input type="radio"/>                                                             | 1     |
| <input type="radio"/>                                                             | 2     |
| <input type="radio"/>                                                             | 3     |
| <input type="radio"/>                                                             | 4     |
| <input type="radio"/>                                                             | 5     |
| <input type="radio"/>                                                             | NS/NC |
| 03 Puede que, por mi desconocimiento, no sea capaz de usarlo (valores invertidos) |       |
| <input type="radio"/>                                                             | 1     |
| <input type="radio"/>                                                             | 2     |
| <input type="radio"/>                                                             | 3     |
| <input type="radio"/>                                                             | 4     |
| <input type="radio"/>                                                             | 5     |
| <input type="radio"/>                                                             | NS/NC |
| <b>Utilidad percibida</b>                                                         |       |
| 04 Estoy entusiasmado(a) con la idea de utilizarlo                                |       |
| <input type="radio"/>                                                             | 1     |
| <input type="radio"/>                                                             | 2     |
| <input type="radio"/>                                                             | 3     |
| <input type="radio"/>                                                             | 4     |
| <input type="radio"/>                                                             | 5     |
| <input type="radio"/>                                                             | NS/NC |
| 05 Siento que usando algo similar, podría sentirme menos solo(a)                  |       |
| <input type="radio"/>                                                             | 1     |
| <input type="radio"/>                                                             | 2     |
| <input type="radio"/>                                                             | 3     |
| <input type="radio"/>                                                             | 4     |
| <input type="radio"/>                                                             | 5     |
| <input type="radio"/>                                                             | NS/NC |
| <b>Actitud hacia el uso</b>                                                       |       |

|                                                                                                        |       |
|--------------------------------------------------------------------------------------------------------|-------|
| 06 ¿Cuántas experiencia tiene en el uso de dispositivos?                                               |       |
| <input type="radio"/>                                                                                  | 1     |
| <input type="radio"/>                                                                                  | 2     |
| <input type="radio"/>                                                                                  | 3     |
| <input type="radio"/>                                                                                  | 4     |
| <input type="radio"/>                                                                                  | 5     |
| <input type="radio"/>                                                                                  | NS/NC |
| 07 Creo que para utilizar un dispositivo necesitaré ayuda y será difícil para mí. (valores invertidos) |       |
| <input type="radio"/>                                                                                  | 1     |
| <input type="radio"/>                                                                                  | 2     |
| <input type="radio"/>                                                                                  | 3     |
| <input type="radio"/>                                                                                  | 4     |
| <input type="radio"/>                                                                                  | 5     |
| <input type="radio"/>                                                                                  | NS/NC |
| 08 Creo que el dispositivo me ayudará bastante y hará lo que yo digo                                   |       |
| <input type="radio"/>                                                                                  | 1     |
| <input type="radio"/>                                                                                  | 2     |
| <input type="radio"/>                                                                                  | 3     |
| <input type="radio"/>                                                                                  | 4     |
| <input type="radio"/>                                                                                  | 5     |
| <input type="radio"/>                                                                                  | NS/NC |
| <b>Relevancia</b>                                                                                      |       |
| 09 Tengo claro para que sirve un dispositivo                                                           |       |
| <input type="radio"/>                                                                                  | 1     |
| <input type="radio"/>                                                                                  | 2     |
| <input type="radio"/>                                                                                  | 3     |
| <input type="radio"/>                                                                                  | 4     |
| <input type="radio"/>                                                                                  | 5     |
| <input type="radio"/>                                                                                  | NS/NC |
| 10 Interactuar con el dispositivo no parece difícil                                                    |       |
| <input type="radio"/>                                                                                  | 1     |
| <input type="radio"/>                                                                                  | 2     |
| <input type="radio"/>                                                                                  | 3     |
| <input type="radio"/>                                                                                  | 4     |
| <input type="radio"/>                                                                                  | 5     |
| <input type="radio"/>                                                                                  | NS/NC |
| 11 Cuánto tiempo al día usaría el sistema                                                              |       |
| <input type="radio"/>                                                                                  | 1     |
| <input type="radio"/>                                                                                  | 2     |
| <input type="radio"/>                                                                                  | 3     |
| <input type="radio"/>                                                                                  | 4     |
| <input type="radio"/>                                                                                  | 5     |

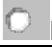

NS/NC

## Modified from TAM (Technology Acceptance Model)

Taking into account a technological device for aging in place (for example a voice assistant), answer the following questions from 1 (less or not at all) to 5 (totally agree)

|                                                                      |       |
|----------------------------------------------------------------------|-------|
| <b>Perceived ease of use</b>                                         |       |
| 01 I feel that I could use this system well                          |       |
| <input type="radio"/>                                                | 1     |
| <input type="radio"/>                                                | 2     |
| <input type="radio"/>                                                | 3     |
| <input type="radio"/>                                                | 4     |
| <input type="radio"/>                                                | 5     |
| <input type="radio"/>                                                | NS/NC |
| 02 I think it would be easy for me to learn how to use it            |       |
| <input type="radio"/>                                                | 1     |
| <input type="radio"/>                                                | 2     |
| <input type="radio"/>                                                | 3     |
| <input type="radio"/>                                                | 4     |
| <input type="radio"/>                                                | 5     |
| <input type="radio"/>                                                | NS/NC |
| 03 I may not be able to use it due to my ignorance (inverted values) |       |
| <input type="radio"/>                                                | 1     |
| <input type="radio"/>                                                | 2     |
| <input type="radio"/>                                                | 3     |
| <input type="radio"/>                                                | 4     |
| <input type="radio"/>                                                | 5     |
| <input type="radio"/>                                                | NS/NC |
| <b>perceived utility</b>                                             |       |
| 04 I am excited about the idea of using it                           |       |
| <input type="radio"/>                                                | 1     |
| <input type="radio"/>                                                | 2     |
| <input type="radio"/>                                                | 3     |
| <input type="radio"/>                                                | 4     |
| <input type="radio"/>                                                | 5     |
| <input type="radio"/>                                                | NS/NC |
| 05 I feel that by wearing something similar, I could feel less alone |       |
| <input type="radio"/>                                                | 1     |
| <input type="radio"/>                                                | 2     |
| <input type="radio"/>                                                | 3     |
| <input type="radio"/>                                                | 4     |
| <input type="radio"/>                                                | 5     |
| <input type="radio"/>                                                | NS/NC |
| <b>attitude towards use</b>                                          |       |

|                                                                                                     |       |
|-----------------------------------------------------------------------------------------------------|-------|
| 06 How much experience do you have in using devices?                                                |       |
| <input type="radio"/>                                                                               | 1     |
| <input type="radio"/>                                                                               | 2     |
| <input type="radio"/>                                                                               | 3     |
| <input type="radio"/>                                                                               | 4     |
| <input type="radio"/>                                                                               | 5     |
| <input type="radio"/>                                                                               | NS/NC |
| 07 I think that to use a device I will need help and it will be difficult for me. (reversed values) |       |
| <input type="radio"/>                                                                               | 1     |
| <input type="radio"/>                                                                               | 2     |
| <input type="radio"/>                                                                               | 3     |
| <input type="radio"/>                                                                               | 4     |
| <input type="radio"/>                                                                               | 5     |
| <input type="radio"/>                                                                               | NS/NC |
| 08 I think the device will help me a lot and will do what I say                                     |       |
| <input type="radio"/>                                                                               | 1     |
| <input type="radio"/>                                                                               | 2     |
| <input type="radio"/>                                                                               | 3     |
| <input type="radio"/>                                                                               | 4     |
| <input type="radio"/>                                                                               | 5     |
| <input type="radio"/>                                                                               | NS/NC |
| <b>Relevance</b>                                                                                    |       |
| 09 I am clear about what a device is for                                                            |       |
| <input type="radio"/>                                                                               | 1     |
| <input type="radio"/>                                                                               | 2     |
| <input type="radio"/>                                                                               | 3     |
| <input type="radio"/>                                                                               | 4     |
| <input type="radio"/>                                                                               | 5     |
| <input type="radio"/>                                                                               | NS/NC |
| 10 Interacting with the device does not seem difficult                                              |       |
| <input type="radio"/>                                                                               | 1     |
| <input type="radio"/>                                                                               | 2     |
| <input type="radio"/>                                                                               | 3     |
| <input type="radio"/>                                                                               | 4     |
| <input type="radio"/>                                                                               | 5     |
| <input type="radio"/>                                                                               | NS/NC |
| 11 How much time per day would you use the system                                                   |       |
| <input type="radio"/>                                                                               | 1     |
| <input type="radio"/>                                                                               | 2     |
| <input type="radio"/>                                                                               | 3     |
| <input type="radio"/>                                                                               | 4     |
| <input type="radio"/>                                                                               | 5     |

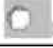

NS/NC
